# Supplementary material for: Nucleic Acid-Dependent Structural Transition of the Intrinsically Disordered N-Terminal Appended Domain of Human Lysyl-tRNA Synthetase
Source: Int J Mol Sci. 2018 Oct 3;19(10):3016. doi: 10.3390/ijms19103016 (PMC6213541; doi:10.3390/ijms19103016)
Supplement: Supplementary file 1 [file ijms-19-03016-s001.pdf]

**Table S1.** Amino acid composition of hRID. Amino acids required for absorbance at 260 nm and 280 nm are marked in red.

| Type               | Amino Acid | # of Residues |
|--------------------|------------|---------------|
| Non-polar          | Ala        | 11            |
|                    | Val        | 6             |
|                    | Leu        | 5             |
|                    | Ile        | 0             |
|                    | Pro        | 2             |
|                    | Met        | 0             |
|                    | Phe        | 0             |
|                    | Trp        | 0             |
| Polar              | Gly        | 3             |
|                    | Ser        | 5             |
|                    | Thr        | 4             |
|                    | Cys        | 0             |
|                    | Asn        | 3             |
|                    | Gln        | 4             |
|                    | Tyr        | 0             |
| Negatively charged | Asp        | 2             |
|                    | Glu        | 11            |
| Positively charged | Lys        | 11            |
|                    | Arg        | 2             |
|                    | His        | 1             |

**A**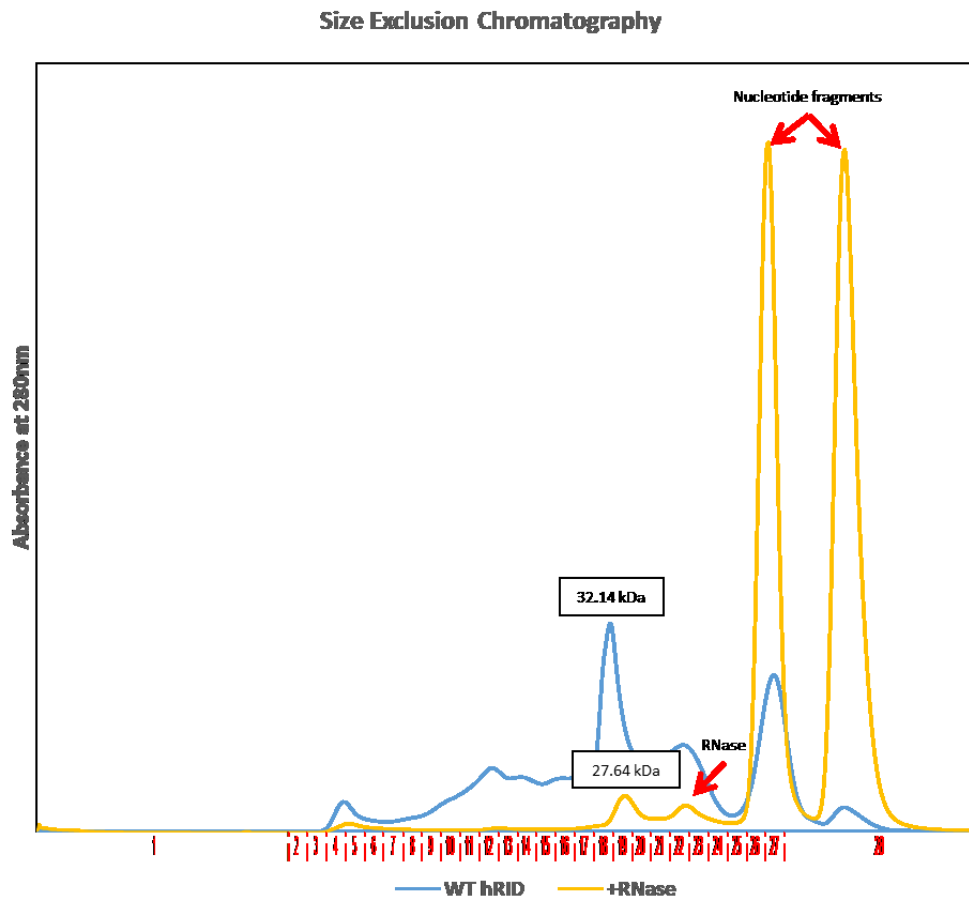**B**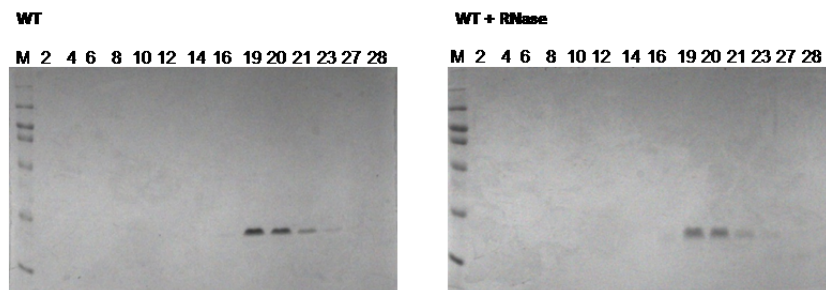

**Figure S1.** Purified hRID is disordered and in the monomeric state. **(A)** Size-exclusion chromatography was performed to verify the quality of purified hRID and RNaseA treated hRID. **(B)** Absorbance at 280 nm was very low; therefore, the presence of the protein was confirmed by SDS-PAGE. The calculated molecular weight (MW) of hRID have been shown in black boxes.
